# Supplementary material for: Gut Bacteria Promote Phosphine Susceptibility of Tribolium castaneum by Aggravating Oxidative Stress and Fitness Costs
Source: MDPI journal article supplement (doi:10.3390/insects14100815), 2023-10-15

## **Supporting Information**

### **Gut Bacteria Promote Phosphine Susceptibility of *Tribolium castaneum* by Aggravating Oxidative Stress and Fitness Costs**

**Zhengyan Wang \*, Shan Zhang, Zhiyuan Liu, Zhenzhen Chang and Haisheng Hu**

School of Food and Strategic Reserves, Henan University of Technology,  
Zhengzhou 450001, China; 2022920144@stu.haut.edu.cn (S.Z.);  
2022920138@stu.haut.edu.cn (Z.L.); 2021920132@stu.haut.edu.cn (Z.C.);  
2020920229@stu.haut.edu.cn (H.H.)

\* Correspondence: zywang@haut.edu.cn

Table S1 Primers used for qRT-PCR

| Primer name                         | Primer sequence (5'-3') | Product size (bp) | Amplification efficiency (E%) | Coefficient of determination (R <sup>2</sup> ) | Usage                       |
|-------------------------------------|-------------------------|-------------------|-------------------------------|------------------------------------------------|-----------------------------|
| 16S-27F                             | AGAGTTTGATCCTGGCTCAG    | ---               | ---                           | ---                                            | Bacterial identification    |
| 16S-1492R                           | GGTTACCTTGTACGACTT      |                   |                               |                                                |                             |
| Tc- $\beta$ -actin-F                | TCCATCATGAAGTGCGATGT    | 228               | 99.2                          | 1.00                                           | Bacterial quantification    |
| Tc- $\beta$ -actin-R                | CCACATCTGTTGGAATGTCG    |                   |                               |                                                |                             |
| 16S-F                               | TCGTTTGAAAATGTCCT       | 116               | 98.2                          | 0.98                                           | Bacterial quantification of |
| 16S-R                               | GGCGTTGAACTTCCTAAT      |                   |                               |                                                | <i>Brevibacterium</i> sp.   |
| 16S-F                               | AACAATCGAAACCGCATGGT    | 316               | 99.6                          | 0.98                                           | Bacterial quantification of |
| 16S-R                               | TACCGTCAAGGGATGAACAGT   |                   |                               |                                                | <i>Enterococcus</i> sp.     |
| 16S-F                               | TGGAAGAATTCGGTCAGGGAT   | 254               | 99.4                          | 0.99                                           | Bacterial quantification of |
| 16S-R                               | ACTTTCGCTTCTTCCCTGCTA   |                   |                               |                                                | <i>Microbacterium</i> sp.   |
| 16S-F                               | TGTGGGTGGGTGGAAAGTTTTT  | 291               | 97.4                          | 0.99                                           | Bacterial quantification of |
| 16S-R                               | CCGGTACTTCTTCTGCAGGTA   |                   |                               |                                                | <i>Micrococcus</i> sp.      |
| 16S-F                               | TGGGTGTTGGAAAGAATTCGGT  | 265               | 98.8                          | 1.00                                           | Bacterial quantification of |
| 16S-R                               | CGTCACTTCGCTTCTTCCCTA   |                   |                               |                                                | <i>Staphylococcus</i> sp.   |
| Tc- <i>Atf2</i> -F                  | CCAAACTCCAACCAACACG     | 234               | 98.7                          | 0.98                                           | Gene expression             |
| Tc- <i>Atf2</i> -R                  | TTCTCACTCGAACTGGGGCT    |                   |                               |                                                | quantification              |
| Tc- <i>CAT3</i> -F                  | ATCGCAACCCGGAAGACTAC    | 184               | 99.0                          | 1.00                                           | Gene expression             |
| Tc- <i>CAT3</i> -R                  | TTGAAGGGACAGTTGACGGG    |                   |                               |                                                | quantification              |
| Tc- <i>DUOX</i> -F                  | CGATGAGAGTGCCGCTTTTT    | 250               | 100.4                         | 0.99                                           | Gene expression             |
| Tc- <i>DUOX</i> -R                  | GCGATGATGTTTTGGACGGT    |                   |                               |                                                | quantification              |
| Tc- <i>IMD</i> -F                   | CAAGGGCGCTGGATTTCTCA    | 174               | 97.8                          | 0.99                                           | Gene expression             |
| Tc- <i>IMD</i> -R                   | CGTCTTGCTGGTTTGTGTCC    |                   |                               |                                                | quantification              |
| Tc- <i>PLC<math>\beta</math></i> -F | AAAACCTGACCCAACGCAGC    | 190               | 100.7                         | 0.99                                           | Gene expression             |
| Tc- <i>PLC<math>\beta</math></i> -R | TTGGGCTCGTATTGTGCGAT    |                   |                               |                                                | quantification              |
| Tc- <i>PRDX6</i> -F                 | GGACGAGAAGCGCGAATTG     | 192               | 98.5                          | 1.00                                           | Gene expression             |
| Tc- <i>PRDX6</i> -R                 | TGGAGCGAATCAATGACCCT    |                   |                               |                                                | quantification              |
| Tc- <i>Rps18</i> -F                 | CGAAGAGGTCGAGAAAATCG    | 235               | 98.8                          | 0.99                                           | Gene expression             |
| Tc- <i>Rps18</i> -R                 | CGTGGTCTTGGTGTGTTGAC    |                   |                               |                                                | quantification              |
| Tc- <i>SOD1a</i> -F                 | GCCATCGTGTGCCTCAAATC    | 238               | 97.9                          | 0.99                                           | Gene expression             |
| Tc- <i>SOD1a</i> -R                 | TCCCGAGATCACCAACGTG     |                   |                               |                                                | quantification              |
| Tc- <i>SOD1b</i> -F                 | CCTCCACATTCACCAGTCGG    | 225               | 101.1                         | 0.99                                           | Gene expression             |
| Tc- <i>SOD1b</i> -R                 | ACAATCGAACGGCCCAAT      |                   |                               |                                                | quantification              |
| Tc- <i>SOD1c</i> -F                 | TGTGTCCTAAACGGCGAAGT    | 241               | 97.3                          | 1.00                                           | Gene expression             |
| Tc- <i>SOD1c</i> -R                 | CGATATCCCCAAATCCCCCA    |                   |                               |                                                | quantification              |
| Tc- <i>SOD2</i> -F                  | CTCGCTACAGCCCCCTTG      | 126               | 98.7                          | 0.99                                           | Gene expression             |
| Tc- <i>SOD2</i> -R                  | GTGGTGTGTTGGAGTGGTGA    |                   |                               |                                                | quantification              |
| Tc- <i>Toll</i> -F                  | CATGCGTACCGCCAAAATACA   | 250               | 99.3                          | 1.00                                           | Gene expression             |
| Tc- <i>Toll</i> -R                  | ACGCTTCGGGTAAAGTCTACAA  |                   |                               |                                                | quantification              |

Figure S1 The neighbour-joining phylogenetic tree of five culturable gut bacteria isolated from adult *Tribolium castaneum*. The tree was constructed from 16S rDNA sequences (1422–1465 bp) using the generalized time-reversible model.

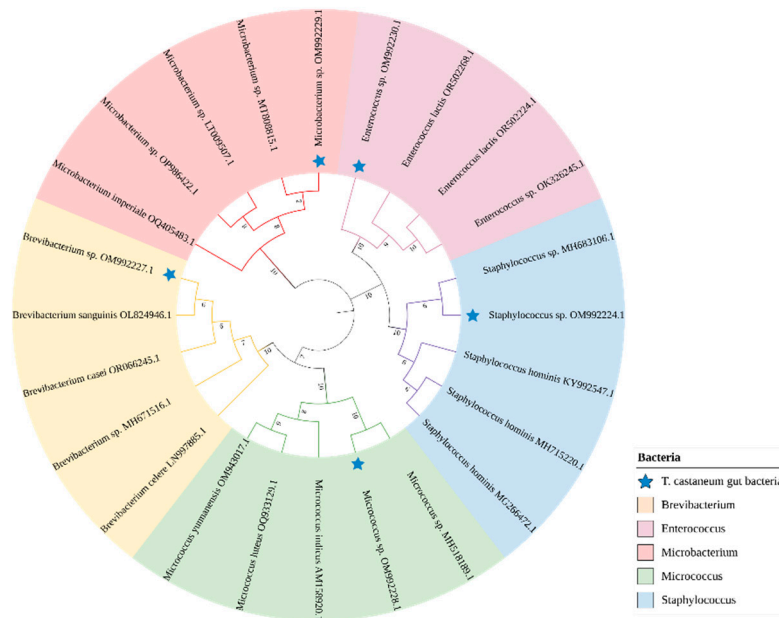

Supplement: s1 [file s1]
